# Supplementary material for: Dihydrochalcones inMalusinhibit bacterial growth by reducing cell membrane integrity
Source: Royal Society of Chemistry journal article supplement (doi:10.1039/d0fo00037j), 2020-01-01
Supplement: d0fo00037j1.pdf [file d0fo00037j1.pdf]

**Supplementary Table 1.** Primers for real time q-PCR.

| Bacteria             | Genes            | Primer            | Sequence               |                      |
|----------------------|------------------|-------------------|------------------------|----------------------|
| <i>K. pneumoniae</i> | <i>fabG</i>      | <i>fabG</i> -F    | TTGTTGCTCCGGGCTTTA     |                      |
|                      |                  | <i>fabG</i> -R    | GCTGGCGATTTCATTTGG     |                      |
|                      | <i>fabA</i>      | <i>fabA</i> -F    | GGTGGATGGGATGACCTTT    |                      |
|                      |                  | <i>fabA</i> -R    | GCTTCCGTCGCCTTG TAG    |                      |
|                      | <i>fabZ</i>      | <i>fabZ</i> -F    | GCCTCACCGTTACCCGTTCC   |                      |
|                      |                  | <i>fabZ</i> -R    | GCTTGCGCCATTGCTTCC     |                      |
|                      | <i>cfa</i>       | <i>cfa</i> -F     | GTCACCACTACCACCCTTTCCC |                      |
|                      |                  | <i>cfa</i> -R     | CCGCCTCAATCATCTCCACC   |                      |
|                      | <i>pspA</i>      | <i>pspA</i> -F    | AGTGAAACCCGTGCTCGTC    |                      |
|                      |                  | <i>pspA</i> -R    | GAGCCATCGCTTCATCCA     |                      |
|                      | <i>16sRNA</i>    | <i>16srRNA</i> -F | CCCCTGGACAAAGACTGA     |                      |
|                      |                  | <i>16srRNA</i> -R | TTTACGGCGTGGACTACC     |                      |
|                      | <i>M. luteus</i> | <i>acpP</i>       | <i>acpP</i> -F         | GAACTTCTCCTCCGCGTTGA |
|                      |                  |                   | <i>acpP</i> -R         | GCCTGGCAGAAATCGTGAAC |
| <i>fabD</i>          |                  | <i>fabD</i> -F    | GGTCAGGGGTCACAGAAACCA  |                      |
|                      |                  | <i>fabD</i> -R    | CGGCAGTGTCCTTGATGGTCT  |                      |
| <i>fabF</i>          |                  | <i>fabF</i> -F    | CGCCATCCATCCCATGAACA   |                      |
|                      |                  | <i>fabF</i> -R    | GAATCCGTCACGGTCCATGT   |                      |
| <i>fabG</i>          |                  | <i>fabG</i> -F    | AGGTTGGTGCCGATGTTGAT   |                      |
|                      |                  | <i>fabG</i> -R    | GAGAACCTGACCCAGCAGTT   |                      |
| <i>fabA</i>          |                  | <i>fabA</i> -F    | TGATCTCCGTATAGCCGTGC   |                      |
|                      |                  | <i>fabA</i> -R    | GCTGATCCTGAGCATCGACAA  |                      |
| <i>16sRNA</i>        |                  | <i>16srRNA</i> -F | CTGGTGTACAGGTGGTGCAT   |                      |
|                      |                  | <i>16srRNA</i> -R | CACCTTCCTCCGAGTTGACC   |                      |
